# Supplementary material for: End-grafted Cu-NNN pincer complexes on PAMAM dendrimers-SiO2: synthesis and characterization
Source: Royal Society of Chemistry journal article supplement (doi:10.1039/d0nj02693j), 2020-01-01
Supplement: d0nj02693j1.pdf [file d0nj02693j1.pdf]

## Supplementary

### **End-grafted Cu-NNN pincer complexes on PAMAM dendrimers-SiO<sub>2</sub>: synthesis and characterization**

Gholamhossein Mohammadnezhad<sup>a\*</sup>, Mitra Esfandiari<sup>a</sup>, Frank Steiniger<sup>b</sup>

*<sup>a</sup> Department of Chemistry, Isfahan University of Technology, Isfahan, 84156-83111, Islamic Republic of  
Iran*

*<sup>b</sup> Center for Electron Microscopy, Jena University Hospital, Ziegmühlenweg 1, 07743 Jena, Germany*

---

\*Corresponding author. Tel.; +98-31-3391-3279; FAX: +98-31-3391-2350.

Email: mohammadnezhad@cc.iut.ac.ir; [g\\_m1358@yahoo.com](mailto:g_m1358@yahoo.com) (G. Mohammadnezhad).

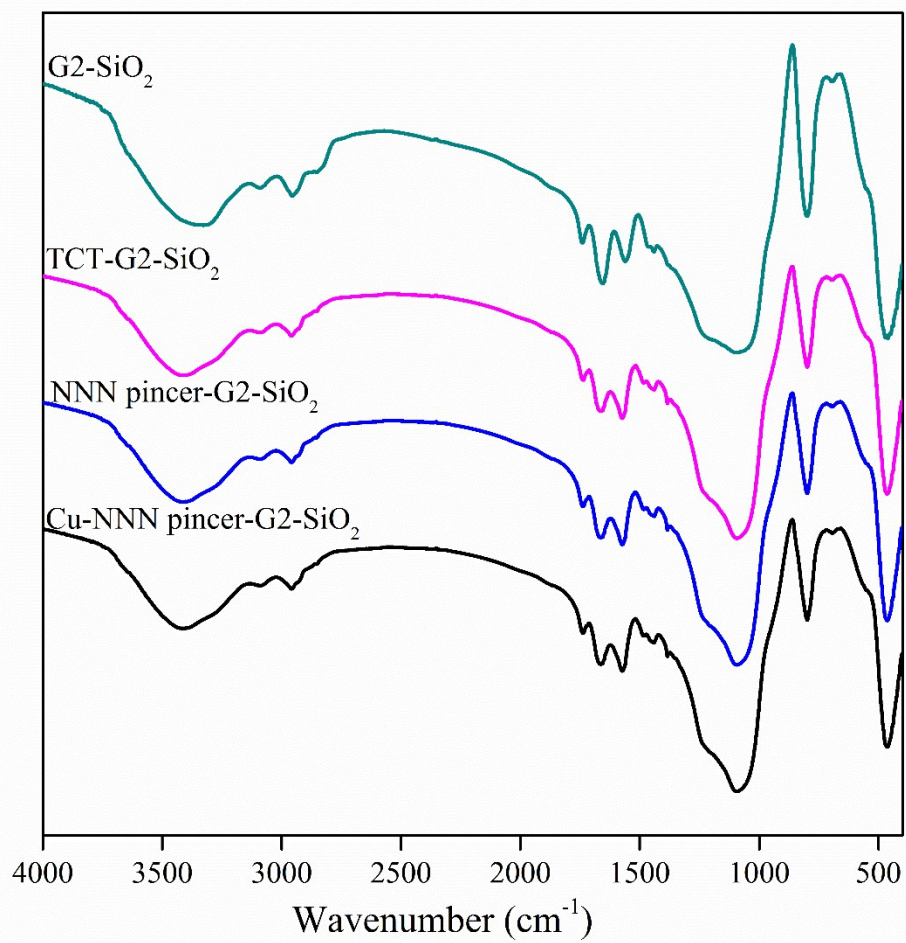

Figure S1 FTIR spectra of G2-SiO<sub>2</sub>, TCT-G2-SiO<sub>2</sub>, NNN pincer-G2-SiO<sub>2</sub> and Cu-NNN pincer-G2-SiO<sub>2</sub>.

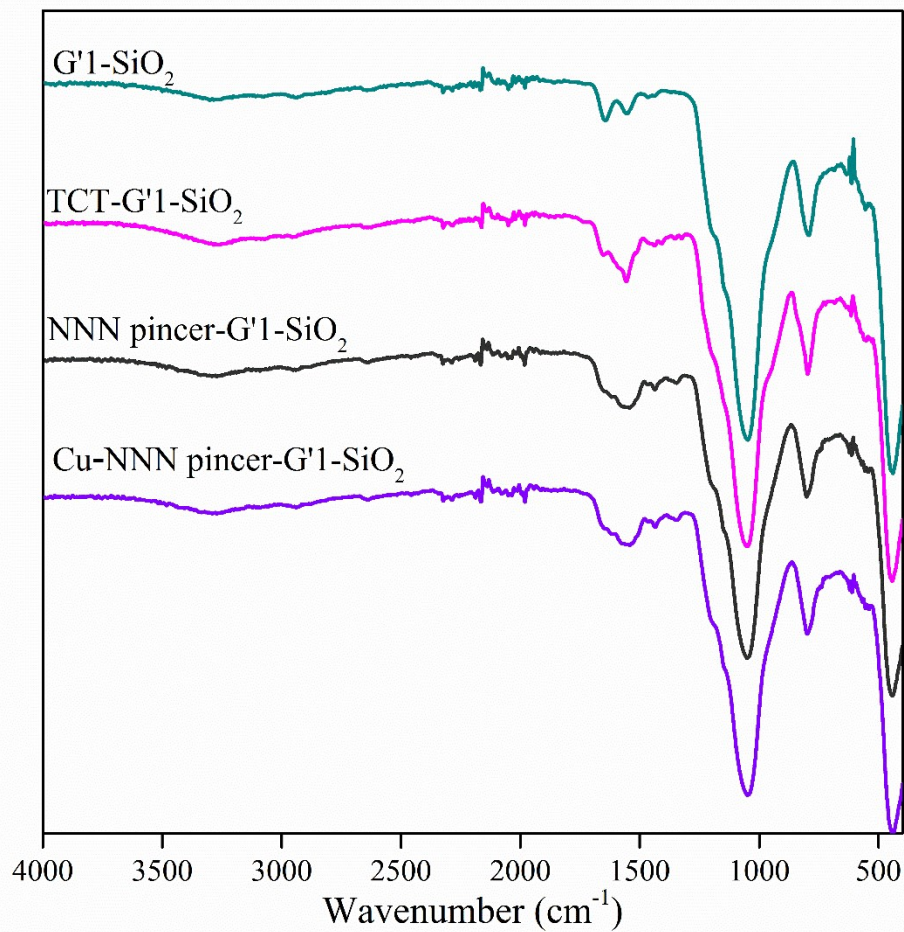

Figure S2 FTIR spectra of G'1-SiO<sub>2</sub>, TCT-G'1-SiO<sub>2</sub>, NNN pincer-G'1-SiO<sub>2</sub> and Cu-NNN pincer-G'1-SiO<sub>2</sub>.

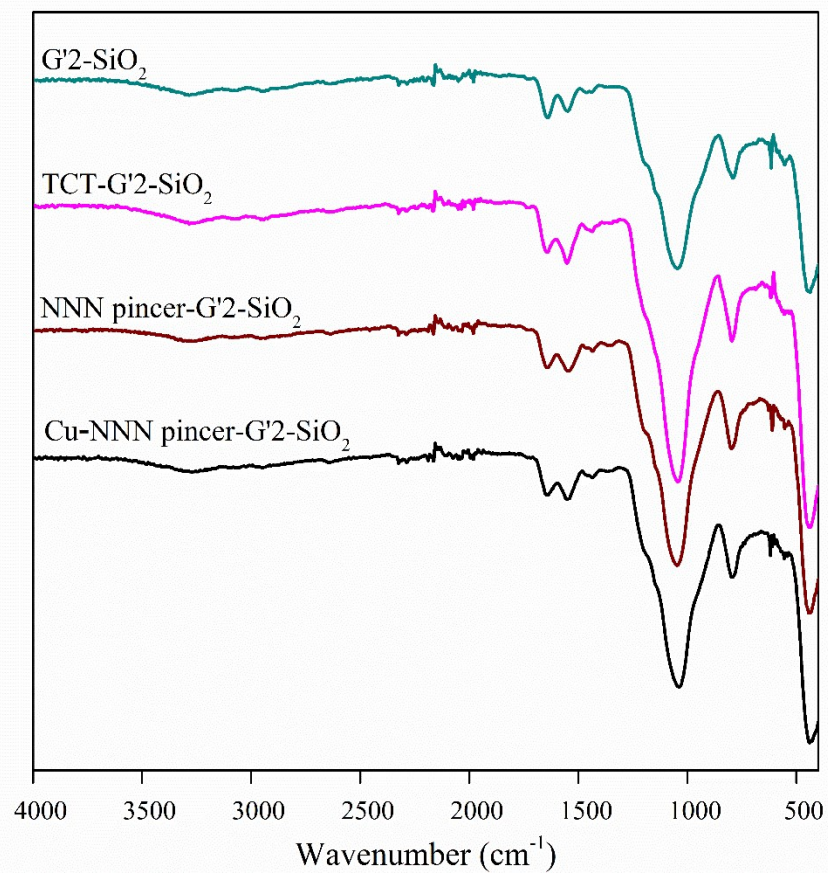

Figure S3 FTIR spectra of G'2-SiO<sub>2</sub>, TCT-G'2-SiO<sub>2</sub>, NNN pincer-G'2-SiO<sub>2</sub> and Cu-NNN pincer-G'2-SiO<sub>2</sub>.



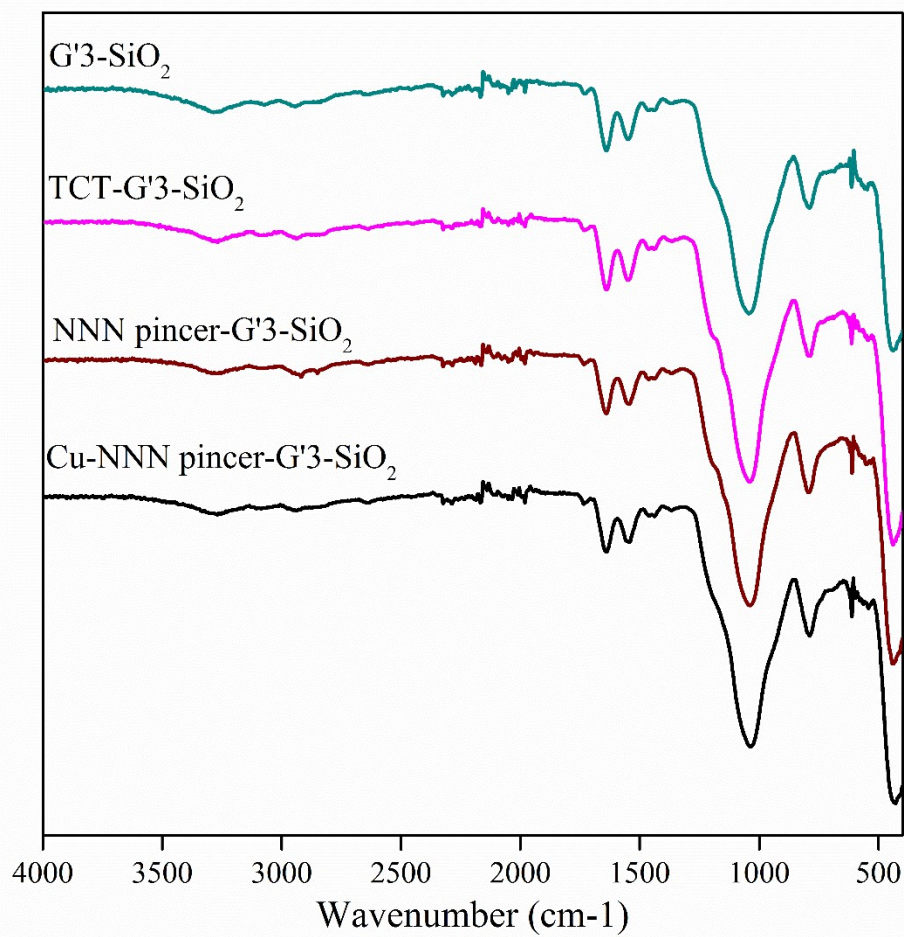

Figure S4 FTIR spectra of G'3-SiO<sub>2</sub>, TCT-G'3-SiO<sub>2</sub>, NNN pincer-G'3-SiO<sub>2</sub> and Cu-NNN pincer-G'3-SiO<sub>2</sub>.

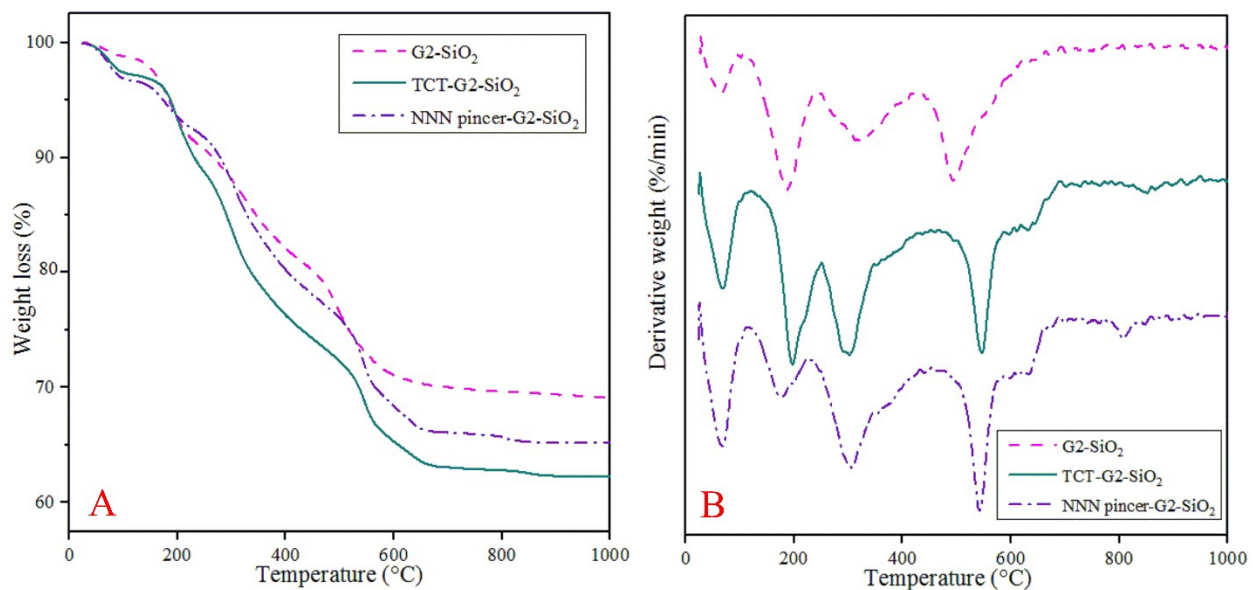

Figure S5 (A): TGA curves, (B): DTG curves of G2-SiO<sub>2</sub>, TCT-G2-SiO<sub>2</sub>, NNN pincer-G2-SiO<sub>2</sub>.

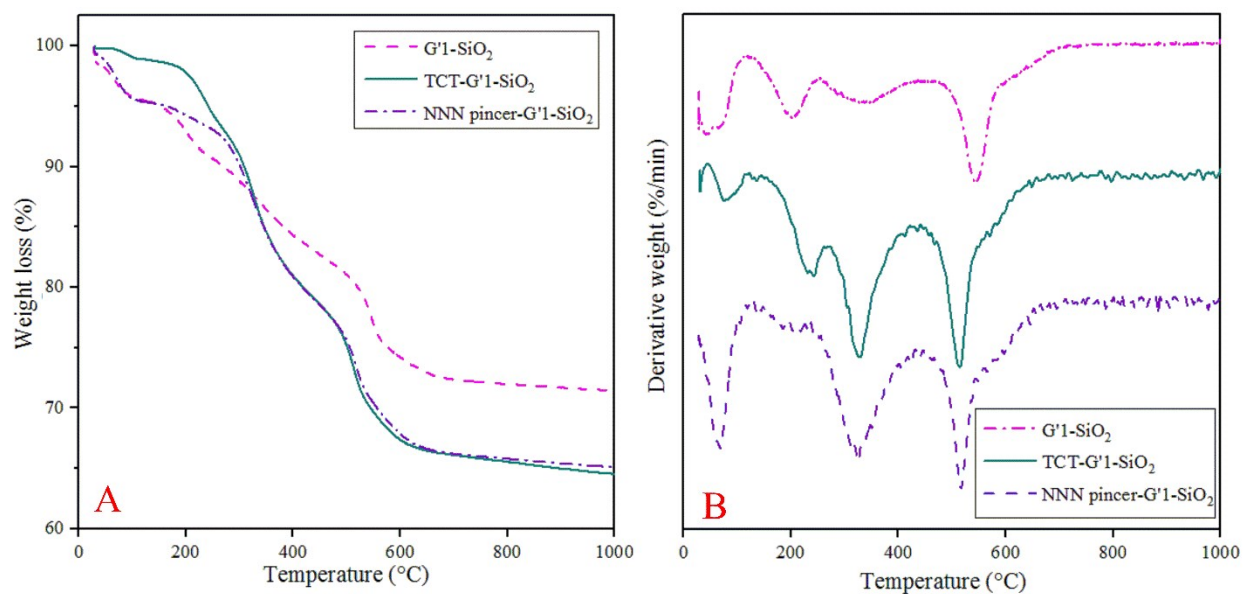

Figure S6 (A): TGA curves, (B): DTG curves of G'1-SiO<sub>2</sub>, TCT-G'1-SiO<sub>2</sub>, NNN pincer-G'1-SiO<sub>2</sub>.

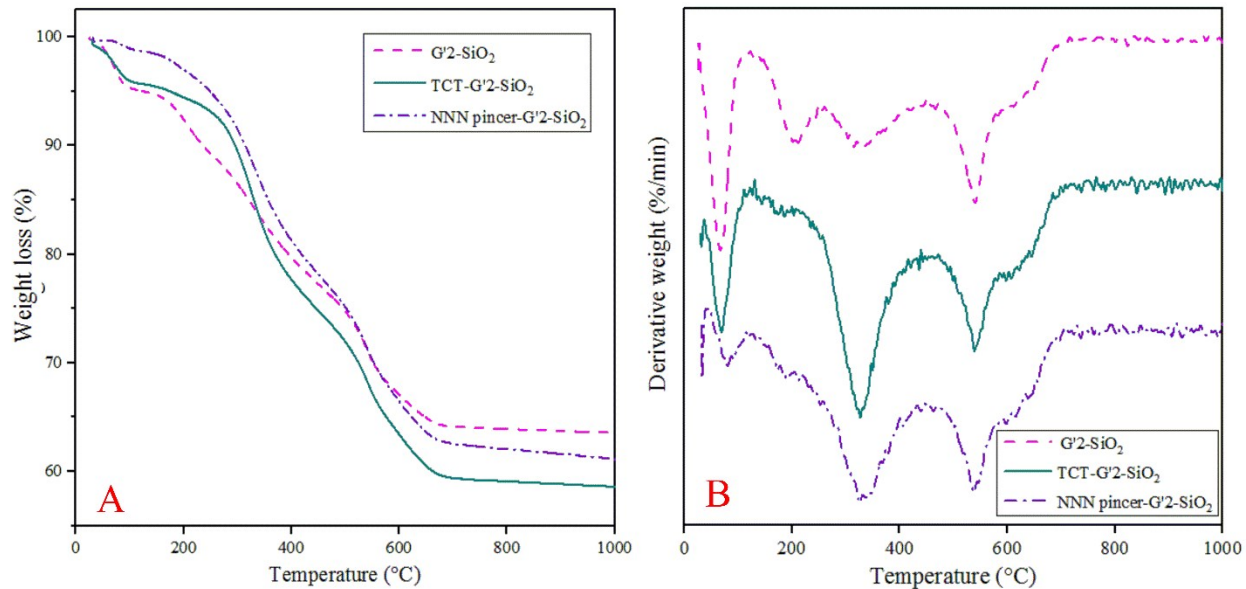

Figure S7 (A): TGA curves, (B): DTG curves of G'2-SiO<sub>2</sub>, TCT- G'2-SiO<sub>2</sub>, NNN pincer- G'2-SiO<sub>2</sub>.

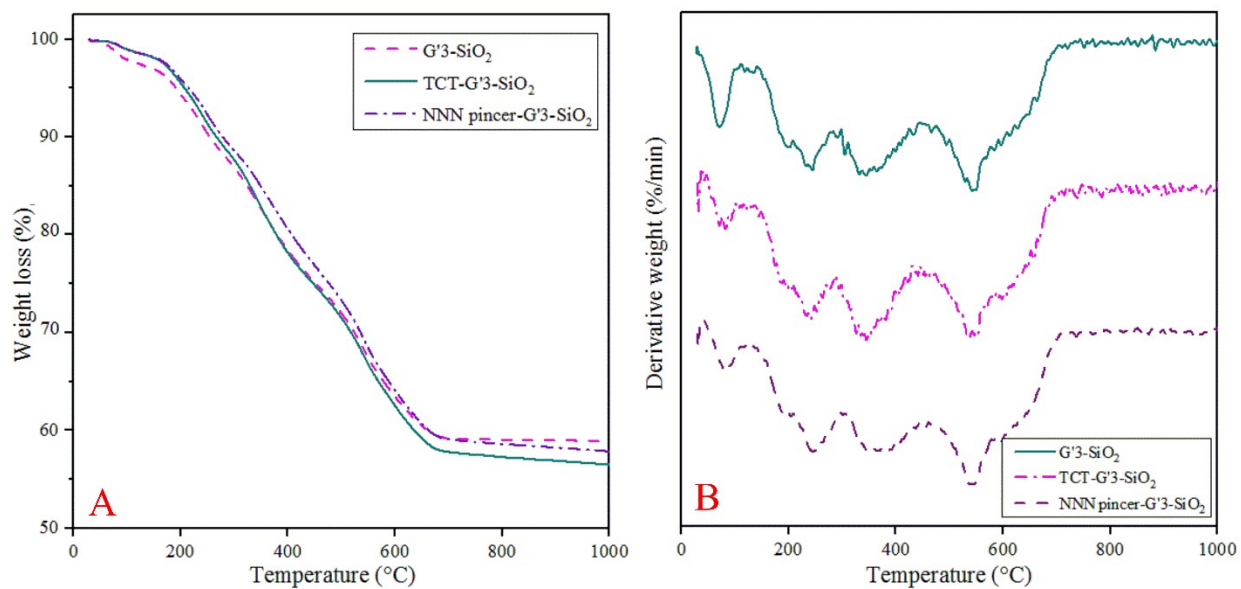

Figure S8 (A) TGA curves, (B) DTG curves of G'3-SiO<sub>2</sub>, TCT- G'3-SiO<sub>2</sub>, NNN pincer- G'3-SiO<sub>2</sub>.

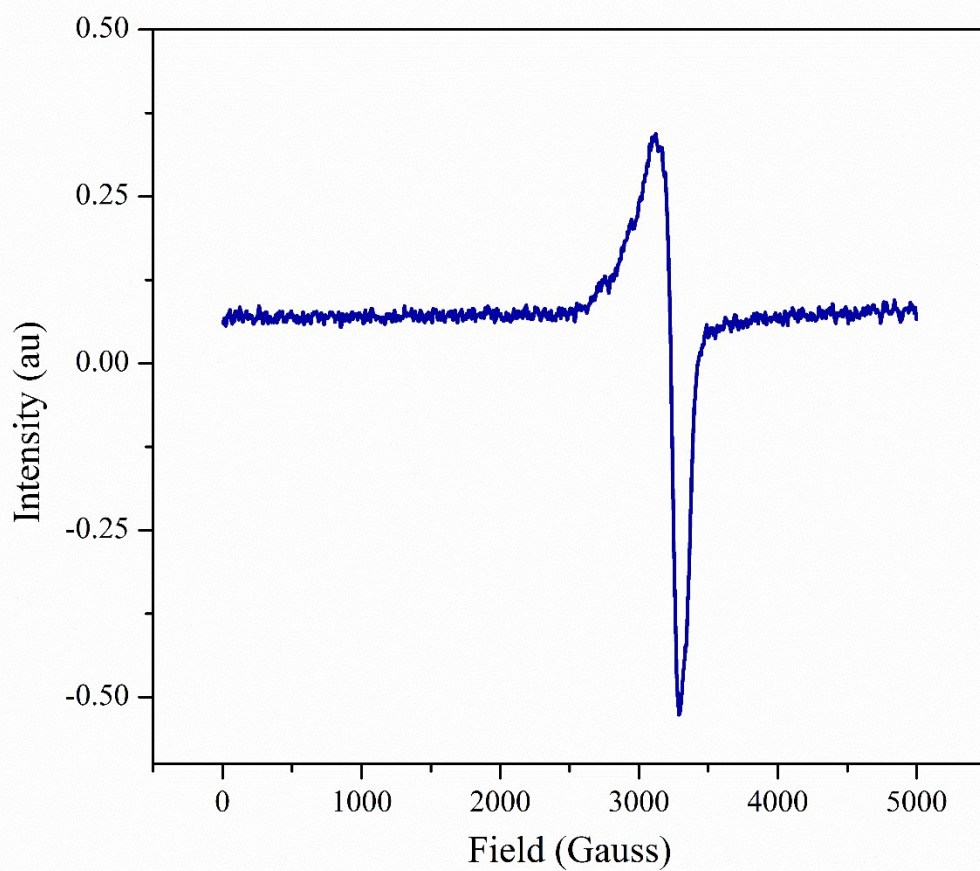

Figure S9 EPR spectrum of Cu-NNN pincer-G1-SiO<sub>2</sub>



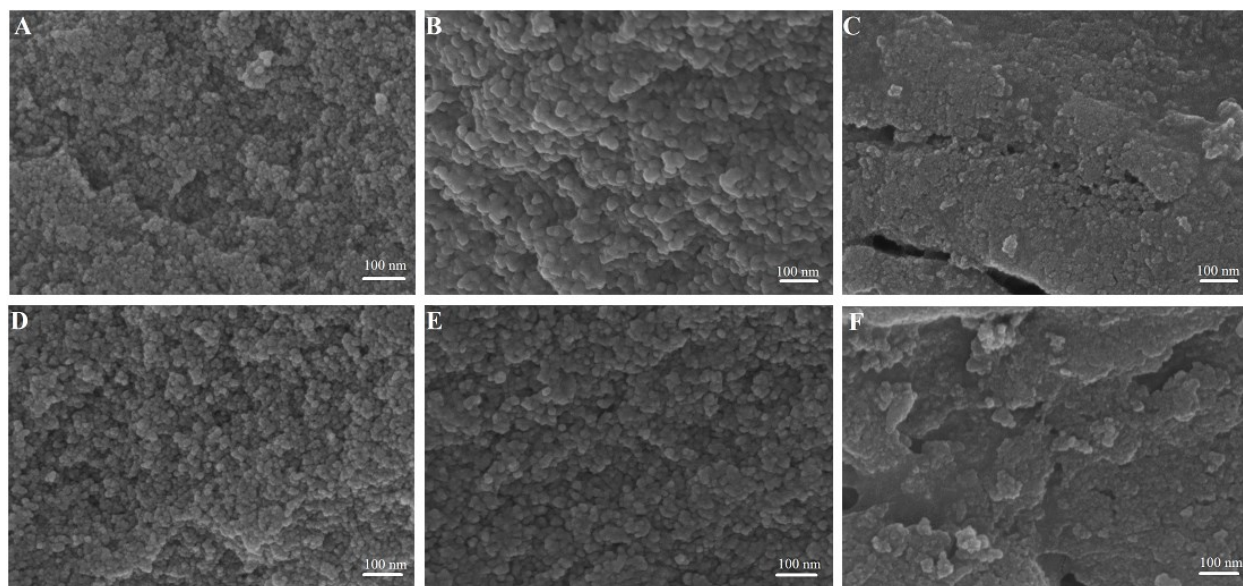

Figure S10 SEM images of A: TCT-G1-SiO<sub>2</sub>, B: NNN pincer- G1-SiO<sub>2</sub>, C: Cu-NNN pincer- G1-SiO<sub>2</sub>  
 D: TCT-G2-SiO<sub>2</sub>, E: NNN pincer- G2-SiO<sub>2</sub>, F: Cu-NNN pincer- G2-SiO<sub>2</sub>.

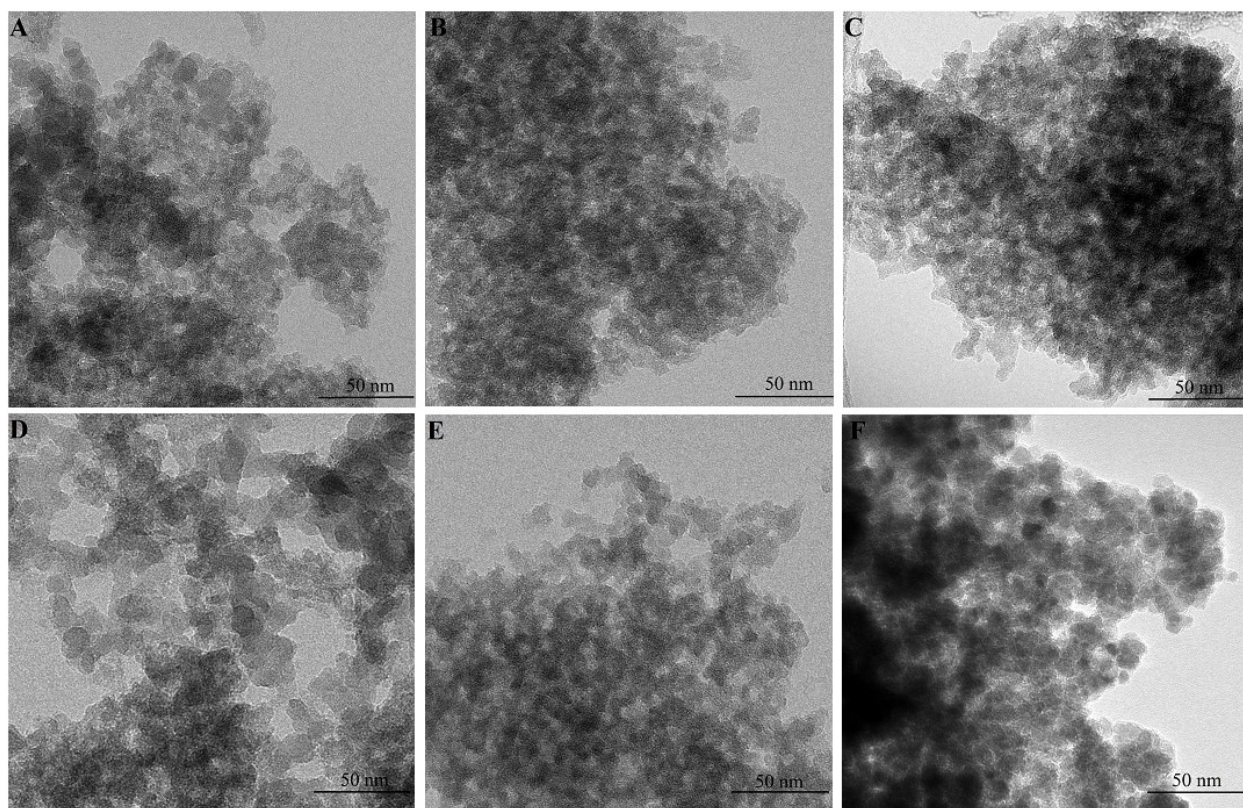

Figure S11 TEM images of A: TCT-G1-SiO<sub>2</sub>, B: NNN pincer- G1-SiO<sub>2</sub>, C: Cu-NNN pincer- G1-SiO<sub>2</sub>  
 D: TCT-G2-SiO<sub>2</sub>, E: NNN pincer- G2-SiO<sub>2</sub>, F: Cu-NNN pincer- G2-SiO<sub>2</sub>.

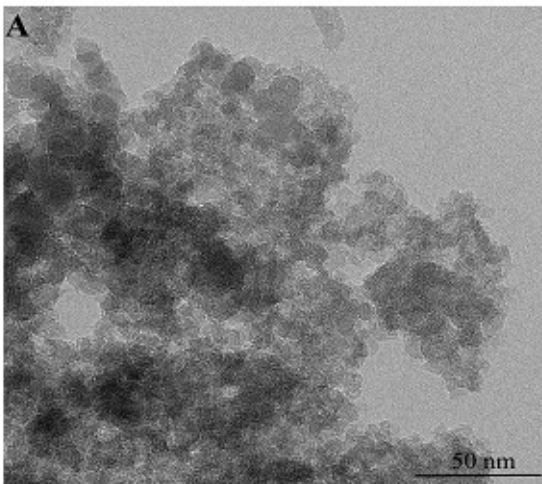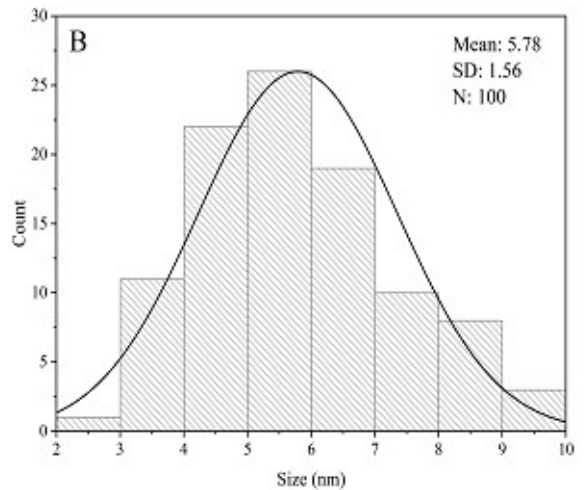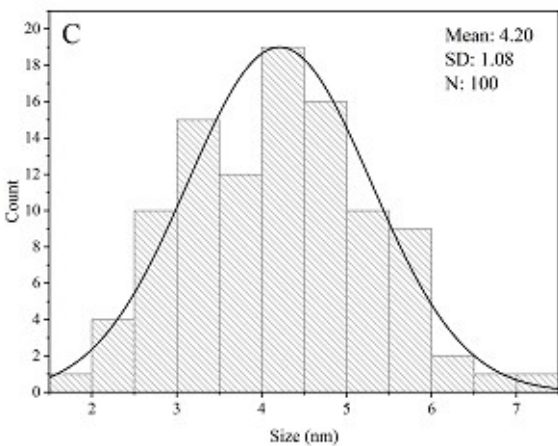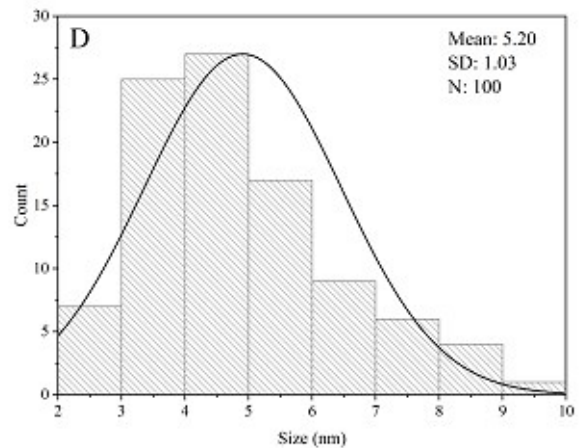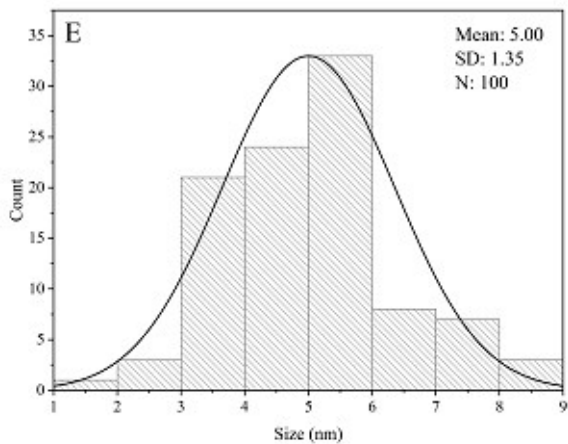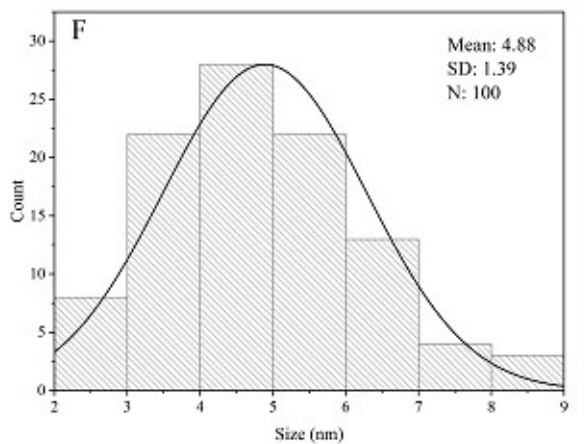

Figure S12 A: TEM image of silica gel, Histogram of B: silica gel, C: G1-SiO<sub>2</sub>, D: Cu-NNN pincer- G1-SiO<sub>2</sub>, E: G2-SiO<sub>2</sub>, F: Cu-NNN pincer- G2-SiO<sub>2</sub>.
